# Supplementary material for: Levels of Circulating PD-L1 Are Decreased in Patients with Resectable Cholangiocarcinoma
Source: MDPI journal article supplement (doi:10.3390/ijms22126569), 2021-06-18
Supplement: s1 [file s1]

## Supplementary Figure legends

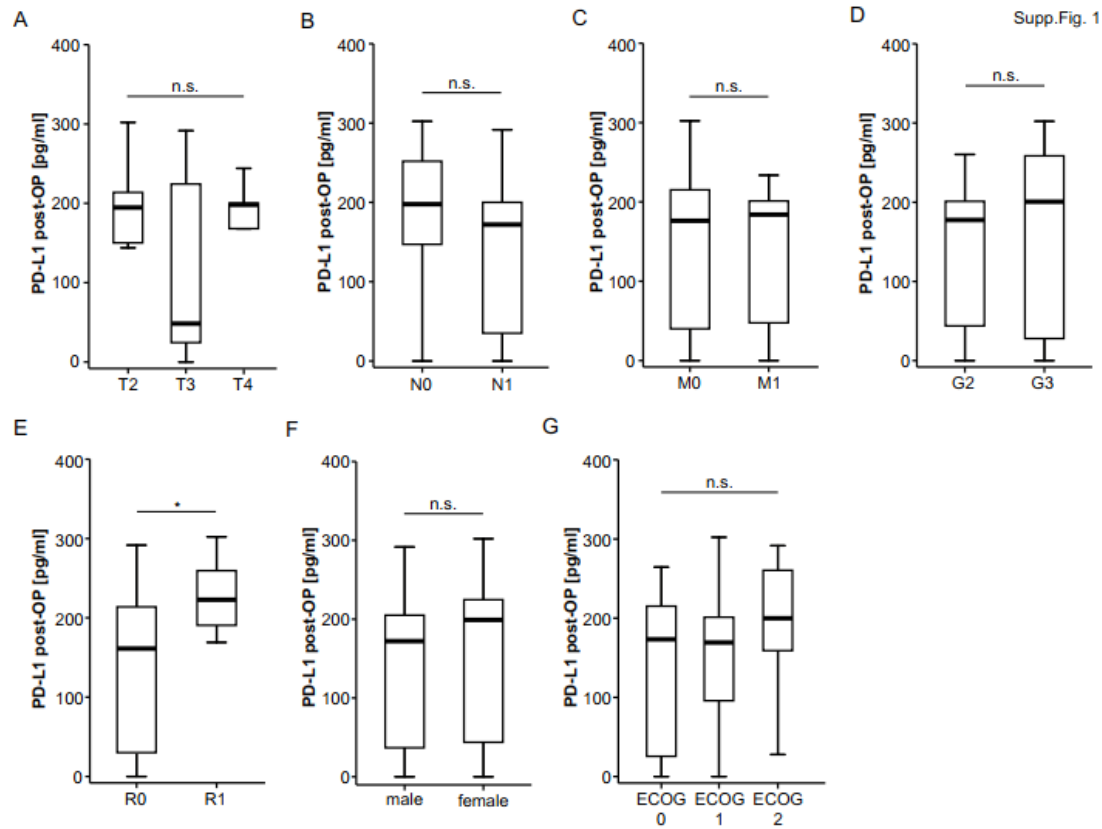

**Supplementary Figure S1. Post-operative serum PD-L1 does not correlate with clinicopathological characteristics**

Post-operative serum PD-L1 levels do not differ between different TNM status (A-C) and moderately or poorly differentiated tumors (D). Patients with a complete (R0) tumor resection have significantly lower post-operative PD-L1 serum levels. Post-operative PD-L1 serum levels are unaltered between male and female patients (F) and patients with different ECOG performance status (G).

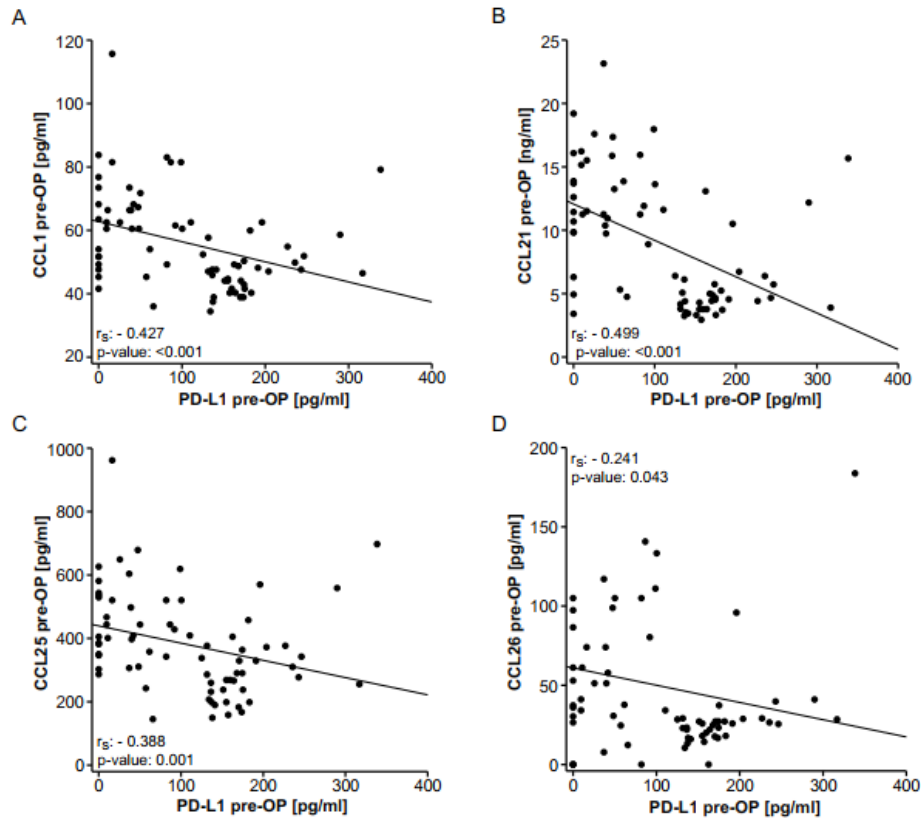

Supplementary Figure S2. Serum PD-L1 negatively correlates with pro-malignant circulating cytokines

Preoperative serum PD-L1 levels show a negative correlation with serum levels of CCL1 (A), CCL21 (B), CCL25 (C) and CCL26 (D).

## Supplementary Tables

**Supplementary Table S1:** Serum levels of various laboratory markers

|                            | <b>BTC patients</b><br>median [range] | <b>Healthy controls</b><br>median [range] |
|----------------------------|---------------------------------------|-------------------------------------------|
| PD-L1 pre-OP [pg/ml]       | 110.08 [0.0-338.46]                   | 182.3 [0.0-407.76]                        |
| PD-L1 post-OP [pg/ml]      | 177.49 [0.0-302.11]                   | -                                         |
| CEA [µg/l]                 | 3.25 [0.71-333.0]                     | 1.30 [0.3-6.30]                           |
| CA19-9 [U/ml]              | 81.4 [0.60-22911.0]                   | 5.35 [0.0-44.1]                           |
| Leucocyte count [cells/nl] | 7.9 [2.90-21.60]                      | -                                         |
| Platelets [cells/nl]       | 275.5 [75.0-931.0]                    | -                                         |
| Sodium [mmol/l]            | 139.0 [131.0-146.0]                   | -                                         |
| Potassium [mmol/l]         | 4.30 [2.90-5.50]                      | -                                         |
| AST [U/l]                  | 50.0 [18.0-1587.0]                    | 30.0 [20.0-78.0]                          |
| ALT [U/l]                  | 50.0 [10.0-1097.0]                    | 24.0 [5.0-82.0]                           |
| GGT [U/l]                  | 349.5 [36.0-2015.0]                   | 19.0 [8.0-120.0]                          |
| ALP [U/l]                  | 230.0 [53.0-1055.00]                  | 69.0 [40.0-102.0]                         |
| CRP [mg/l]                 | 18.5 [0.0-230.0]                      |                                           |
| Bilirubin [mg/dl]          | 1.1 [0.24-21.49]                      | 0.44 [0.10-1.46]                          |
| Creatinine [mg/dl]         | 0.83 [0.43-1.62]                      | -                                         |
| CRP [mg/l]                 | 18.5 [0.0-230.0]                      |                                           |
| CCL1 [pg/ml]               | 51.68 [34.44-115.7]                   |                                           |
| CCL21 [ng/ml]              | 6.73 [2.94-23.15]                     |                                           |
| CCL25 [pg/ml]              | 358.04 [144.96-961.91]                |                                           |
| CCL26 [pg/ml]              | 28.76 [0.0-422.90]                    |                                           |

AST: aspartate transaminase, ALT: alanine transaminase, ALP: alkaline phosphatase, CA19-9: carbohydrate-Antigen 19-9, CEA: carcinoembryonic antigen, CCL: C-chemokine ligand, CRP: C-reactive protein, GGT: γ-Glutamyl transpeptidase, PD-L1: Programmed cell death 1 ligand 1
